# Supplementary material for: Management of pancreatic pseudocysts—A retrospective analysis
Source: PLoS One. 2017 Sep 6;12(9):e0184374. doi: 10.1371/journal.pone.0184374 (PMC5587297; doi:10.1371/journal.pone.0184374)
Supplement: S1 Table — (XLSX) [file pone.0184374.s001.xlsx]

## Sheet: Tabelle1
Dependent variable: local complications
Independent variables	p value in univariate analysis	high probability of impact
acute pancreatitis	0.027
chronic pancreatitis	0.002
gender		because of the surprisingly high proportion of women in this patient cohort
diameter of cyst		size is reported as indication for intervention by other publications (Ref. 20)
number of cysts		as each cyst can cause complications more cysts are likely to cause more complications
location of cyst		local complications depend on cyst localisation
smoker	0.051
