# Supplementary material for: Management of pancreatic pseudocysts—A retrospective analysis
Source: PLoS One. 2017 Sep 6;12(9):e0184374. doi: 10.1371/journal.pone.0184374 (PMC5587297; doi:10.1371/journal.pone.0184374)
Supplement: S2 Table — (XLSX) [file pone.0184374.s002.xlsx]

## Sheet: Tabelle1
Dependent variable: symptomatic cysts (pain, malabsorption, weight loss, etc.)
Independent variables	p value in univariate analysis	high probability of impact
acute pancreatitis	0.026
chronic pancreatitis
gender		because of the surprisingly high proportion of women in this patient cohort
diameter of cyst		size is reported as indication for intervention by other publications (Ref. 20)
number of cysts		as each cyst can become symptomatic, more cysts are likely to cause symptoms
location of cyst		symptoms are likely to depend on cyst location
smoker	0.053
